# Supplementary material for: Amplified surface temperature response of cold, deep lakes to inter-annual air temperature variability
Source: PubMed Central journal article supplement (PMC5482815; doi:10.1038/s41598-017-04058-0), 2017-06-23
Supplement: 41598_2017_4058_MOESM1_ESM.pdf [file 41598_2017_4058_MOESM1_ESM.pdf]

Supporting information for

Amplified surface temperature response of cold, deep lakes to inter-annual air  
temperature variability

**Author information**

R. Iestyn Woolway<sup>1\*</sup>, Christopher J. Merchant<sup>1</sup>

**Affiliation**

1. Department of Meteorology, University of Reading, Reading, UK.

\*Corresponding author: [riwoolway@gmail.com](mailto:riwoolway@gmail.com)

**Contents of this file**

Table S1 to S4

**Table S1.** General characteristics of the 144 lakes from which satellite-derived lake surface water temperatures were investigated in this study. Shown are the names of each lake, their latitude ( $\varphi$ ), longitude ( $\lambda$ ), altitude (h), and mean depth ( $z_{\text{mean}}$ ).

| Lake Name    | $\varphi$ ( $^{\circ}$ N) | $\lambda$ ( $^{\circ}$ E) | h (m) | $z_{\text{mean}}$ (m) |
|--------------|---------------------------|---------------------------|-------|-----------------------|
| Superior     | 47.72                     | -88.23                    | 184   | 149                   |
| Huron        | 44.78                     | -82.21                    | 176   | 59                    |
| Michigan     | 43.86                     | -87.09                    | 176   | 85                    |
| Baikal       | 53.63                     | 108.14                    | 450   | 680                   |
| Great Bear   | 65.91                     | -121.3                    | 157   | 71.7                  |
| Great Slave  | 62.09                     | -114.37                   | 158   | 41                    |
| Erie         | 42.25                     | -81.16                    | 174   | 19                    |
| Winnipeg     | 52.12                     | -97.25                    | 217   | 13                    |
| Ontario      | 43.85                     | -77.77                    | 75    | 86                    |
| Ladoga       | 60.84                     | 31.39                     | 11    | 52                    |
| Onega        | 61.9                      | 35.35                     | 56    | 30                    |
| Athabasca    | 59.1                      | -109.96                   | 212   | 26                    |
| Smallwood    | 54.19                     | -64.31                    | 472   | 4.3                   |
| Reindeer     | 57.19                     | -102.27                   | 337   | 17                    |
| Vanern       | 58.88                     | 13.22                     | 45    | 27                    |
| Winnipegosis | 52.37                     | -100.05                   | 252   | 4.24                  |
| Netilling    | 66.42                     | -70.28                    | 30    | 20                    |
| Manitoba     | 50.99                     | -98.8                     | 247   | 12                    |
| Nipigon      | 49.8                      | -88.55                    | 283   | 54.9                  |
| Taymyr       | 74.48                     | 100.76                    | 24    | 2.8                   |
| Woods        | 49.38                     | -94.91                    | 326   | 7.9                   |
| Khanka       | 44.94                     | 132.42                    | 64    | 4.5                   |
| Dubawnt      | 63.13                     | -101.44                   | 235   |                       |
| Peipus       | 58.41                     | 27.59                     | 29    | 7                     |
| Amadjuak     | 64.99                     | -71.13                    | 112   |                       |
| Cedar        | 53.33                     | -100.14                   | 256   | 4.18                  |
| Hovsgol      | 51.02                     | 100.48                    | 1640  | 138                   |
| Iliamna      | 59.56                     | -154.9                    | 35    | 44                    |
| Tai          | 31.21                     | 120.24                    | 2     | 1.9                   |
| Wollaston    | 58.3                      | -103.33                   | 396   | 20.6                  |
| Hulun        | 48.97                     | 117.38                    | 539   | 5                     |
| Mistassini   | 50.82                     | -73.81                    | 374   | 75                    |
| Nueltin      | 60.25                     | -99.4                     | 277   |                       |
| Vattern      | 58.33                     | 14.57                     | 91    | 39                    |

|              |       |         |      |      |
|--------------|-------|---------|------|------|
| Baker        | 64.13 | -95.28  | 2    |      |
| Martre       | 63.33 | -117.91 | 265  | 9    |
| Hungtze      | 33.34 | 118.53  | 3    | 1.4  |
| Astray       | 54.38 | -66.32  | 557  |      |
| Kasba        | 60.34 | -102.27 | 335  |      |
| Claire       | 58.59 | -112.08 | 212  | 1.2  |
| Yathkyed     | 62.69 | -98.07  | 101  |      |
| Ronge        | 55.11 | -104.83 | 371  | 12.7 |
| Eau Claire   | 56.15 | -74.4   | 251  |      |
| Rainy        | 48.61 | -92.97  | 343  | 9.9  |
| Sevan        | 40.39 | 45.29   | 1876 | 41   |
| Vygozero     | 63.54 | 34.84   | 74   | 7.4  |
| Cree         | 57.47 | -106.64 | 484  | 14.9 |
| Har Us       | 48.06 | 92.3    | 1191 | 4    |
| Inari        | 69.04 | 27.83   | 126  | 14.4 |
| Becharof     | 57.85 | -156.4  | 22   | 56   |
| Saint Clair  | 42.5  | -82.73  | 174  | 3    |
| Lesser Slave | 55.43 | -115.49 | 604  | 11.7 |
| Red          | 48.04 | -95.08  | 358  |      |
| Aberdeen     | 64.55 | -98.59  | 76   |      |
| Bienville    | 55.05 | -72.98  | 423  | 13   |
| Paijanne     | 61.71 | 25.49   | 95   | 17   |
| Saint Jean   | 48.66 | -72.02  | 97   | 11.4 |
| Beloye       | 60.18 | 37.64   | 122  | 4.15 |
| Contwoyto    | 65.59 | -110.66 | 444  |      |
| Malaren      | 59.44 | 16.19   | 18   | 11.9 |
| Puruvesi     | 61.77 | 29.02   | 79   | 12   |
| Champlain    | 44.45 | -73.27  | 35   | 22.8 |
| Wholdaia     | 60.69 | -104.15 | 364  |      |
| Gods         | 54.62 | -94.21  | 181  | 13.2 |
| Island       | 53.85 | -94.7   | 230  | 20.1 |
| Takiyuak     | 66.28 | -113.17 | 403  |      |
| Mackay       | 63.96 | -111.3  | 426  |      |
| Topozero     | 65.62 | 32.09   | 112  | 16   |
| Orivesi      | 62.35 | 29.59   | 79   | 17   |
| Hottah       | 64.95 | -118.44 | 221  |      |
| Pielinen     | 63.16 | 29.71   | 113  | 9.9  |
| Nipissing    | 46.24 | -79.92  | 212  | 4.5  |
| Nonacho      | 61.82 | -108.92 | 353  |      |

|                |       |         |      |      |
|----------------|-------|---------|------|------|
| Teshkepuk      | 70.59 | -153.6  | 0    |      |
| Playgreen      | 54.07 | -97.75  | 217  | 4    |
| Haukivesi      | 62.1  | 28.52   | 80   | 17   |
| Khantayskoe    | 68.36 | 91.18   | 54   | 73   |
| Peter Pond     | 55.84 | -108.55 | 423  | 13.7 |
| South Moose    | 53.83 | -100.04 | 256  | 4.1  |
| Aylmer         | 64.15 | -108.46 | 366  |      |
| Garry          | 65.95 | -99.4   | 150  | 6.1  |
| Segozero       | 63.32 | 33.76   | 129  | 29   |
| Point          | 65.31 | -113.84 | 464  |      |
| Chao           | 31.57 | 117.57  | 1    | 3    |
| Simcoe         | 44.47 | -79.42  | 233  | 15   |
| Pyasino        | 69.77 | 87.78   | 17   | 4    |
| Kaminak        | 62.2  | -94.9   | 47   |      |
| Sasykkol       | 46.58 | 80.91   | 342  | 3.3  |
| Cross          | 54.71 | -97.58  | 203  | 8.2  |
| Gras           | 64.54 | -110.38 | 454  |      |
| Ennadai        | 60.96 | -101.31 | 310  |      |
| Yamdruk        | 28.97 | 90.76   | 4446 | 23.6 |
| Kamllukuak     | 62.28 | -101.73 | 266  |      |
| Beysehir       | 37.78 | 31.52   | 1148 | 5    |
| Tulemalu       | 62.99 | -99.48  | 279  |      |
| Evans          | 50.97 | -77.02  | 231  | 5    |
| Pyaozero       | 66.07 | 30.98   | 118  | 15   |
| Clinton Colden | 63.94 | -107.45 | 366  |      |
| Big Trout      | 53.77 | -90.02  | 210  | 10.5 |
| Dore           | 54.76 | -107.28 | 459  | 10.9 |
| Sakami         | 53.22 | -76.75  | 174  | 8    |
| Saint Joseph   | 51.04 | -90.81  | 374  |      |
| Gaoyou         | 32.87 | 119.31  | 1    | 7.9  |
| Buyr           | 47.81 | 117.69  | 597  | 8.1  |
| Selwyn         | 60    | -104.68 | 393  |      |
| Har            | 48.05 | 93.21   | 1160 | 4    |
| Buffalo        | 60.22 | -115.49 | 264  | 2.8  |
| North Moose    | 54.05 | -100.16 | 257  | 4.1  |
| Balaton        | 46.88 | 17.83   | 126  | 4    |
| Atlin          | 59.57 | -133.75 | 704  | 86   |
| Scott          | 60.02 | -106.07 | 450  |      |
| Ferguson       | 69.41 | -105.27 | 11   |      |

|               |       |         |      |      |
|---------------|-------|---------|------|------|
| Tathlina      | 60.54 | -117.64 | 277  |      |
| South Henik   | 61.37 | -97.29  | 184  |      |
| Kaminuriak    | 62.96 | -95.79  | 149  |      |
| Churchill     | 55.96 | -108.29 | 423  | 9    |
| Angikuni      | 62.27 | -100.04 | 256  |      |
| Deschambault  | 54.78 | -103.45 | 329  | 6.2  |
| Labaz         | 72.27 | 99.57   | 48   |      |
| Black         | 59.05 | -105.73 | 277  |      |
| Artillery     | 63.17 | -107.82 | 359  |      |
| Gyaring       | 34.92 | 97.27   | 4256 |      |
| Winnebago     | 44.02 | -88.42  | 229  | 4.7  |
| Ashuanipi     | 52.69 | -66.14  | 596  |      |
| Keitele       | 62.89 | 25.99   | 107  | 7    |
| Dauphin       | 51.27 | -99.77  | 259  | 2.4  |
| Constance     | 47.65 | 9.28    | 431  | 90   |
| Payne         | 59.4  | -73.82  | 138  |      |
| Sandy         | 53    | -93.03  | 282  | 5.36 |
| Granville     | 56.4  | -100.21 | 259  |      |
| Snowbird      | 60.64 | -102.94 | 358  |      |
| Mille Lacs    | 46.24 | -93.65  | 381  | 6.4  |
| Trout         | 60.58 | -121.13 | 494  |      |
| Manouane      | 50.76 | -70.99  | 494  |      |
| Tebesjuak     | 63.76 | -98.98  | 144  |      |
| Naknek        | 58.64 | -155.67 | 39   | 41   |
| Tahoe         | 39.09 | -120.04 | 1996 | 249  |
| Egridir       | 38.07 | 30.85   | 946  | 9    |
| Princess Mary | 63.93 | -97.66  | 115  |      |
| Weishan       | 34.61 | 117.24  | 7    | 4.2  |
| Evoron        | 51.48 | 136.51  | 80   | 2.5  |
| Pyhajarvi     | 61    | 22.28   | 52   | 5.5  |
| Almanor       | 40.26 | -121.19 | 1403 |      |
| Vesjarvi      | 61.09 | 25.39   | 96   | 6    |

**Table S2.** Summary output from a multiple linear regression model ( $r^2 = 84\%$ ,  $p < 0.01$ ) used to describe the global variations in the average time in which lake surface water temperature (LSWT) first persistently exceeds 4°C.

| Factor in model                    | Estimated coefficient | Standard error in coefficient | Significance |
|------------------------------------|-----------------------|-------------------------------|--------------|
| Constant                           | 134.08                | 3.75                          | <0.001       |
| Mean air temperature (°C)          | -5.77                 | 0.26                          | <0.001       |
| Mean depth (log <sub>10</sub> , m) | 10.90                 | 3.07                          | <0.001       |

**Table S3.** Summary output from a multiple linear regression model used to describe the influence of mean depth and annual mean surface air temperature (SAT) on the improvement in the proportion of variance explained by introducing (a) winter (January to March) SAT or (b) the average time in which lake surface water temperature (LSWT) first persistently exceeds 4°C, to a multiple linear regression model of summer (July to September) lake surface water temperature (LSWT) and summer SAT as a predictor.

|            |                                    | Estimated coefficient | Standard error in coefficient | Significance |
|------------|------------------------------------|-----------------------|-------------------------------|--------------|
| <b>(a)</b> |                                    |                       |                               |              |
|            | Constant                           | -0.49                 | 0.57                          | 0.40         |
|            | Mean depth (log <sub>10</sub> , m) | 0.52                  | 0.46                          | 0.26         |
|            | Mean air temperature (°C)          | 0.03                  | 0.04                          | 0.50         |
| <b>(b)</b> |                                    |                       |                               |              |
|            | Constant                           | -2.22                 | 2.70                          | 0.41         |
|            | Mean depth (log <sub>10</sub> , m) | 10.36                 | 2.17                          | <0.001       |
|            | Mean air temperature (°C)          | -1.11                 | 0.19                          | <0.001       |

**Table S4.** Summary output from a multiple linear regression model used to describe the global variations in the length of the warming period, the time difference (in days) between the first time in which lake surface water temperature (LSWT) first persistently exceeds 4°C and the time of maximum LSWT.

| Factor in model                    | Estimated coefficient | Standard error in coefficient | Significance |
|------------------------------------|-----------------------|-------------------------------|--------------|
| Constant                           | 72.21                 | 3.84                          | <0.001       |
| Mean air temperature (°C)          | 5.63                  | 0.26                          | <0.001       |
| Mean depth (log <sub>10</sub> , m) | -2.27                 | 3.14                          | 0.47         |
